# Supplementary material
Source: publisher figshare collection journal article supplement (https://gsajournals.figshare.com/ndownloader/files/28321911)
Supplement: Supplementary file 1 [file 28321911]

## Sheet: Table S5
Table S5 Illumina HiSeq reads statistics and coverage comparison to Williams 82 genome
Sample	Raw Reads (M)	Raw Bases (G)	Raw Q20 (G)	Raw Q30 (G)	Clean Reads (M)	Clean Bases (G)	Clean Q20(G)	Clean Q30(G)	Average Length(bp)	Multiple Mapped(M)	Uniquely Mapped(M)	Gene number
NNL	43.684	6.553	6.280 (95.8%)	5.953 (90.8%)	39.774 (91.0%)	5.825 (88.9%)	5.732 (98.4%)	5.546 (95.2%)	146.5	6.262 (15.74%)	25.596 (64.35%)	31937
NNRX	50.427	7.564	7.288 (96.3%)	6.939 (91.7%)	46.778 (92.8%)	6.873 (90.9%)	6.770 (98.5%)	6.564 (95.5%)	146.9	2.014 (4.31%)	32.216 (68.87%)	33566
NNRJ	54.741	8.211	7.907 (96.3%)	7.520 (91.6%)	50.713 (92.6%)	7.439 (90.6%)	7.325 (98.5%)	7.095 (95.4%)	146.7	5.484 (10.81%)	31.579 (62.27%)	35804
NTL	48.856	7.328	7.106 (97.0%)	6.795 (92.7%)	46.116 (94.4%)	6.784 (92.6%)	6.691 (98.6%)	6.491 (95.7%)	147.1	10.003 (21.69%)	25.111 (54.45%)	36030
NTRX	48.789	7.318	7.063 (96.5%)	6.732 (92.0%)	45.669 (93.6%)	6.709 (91.7%)	6.608 (98.5%)	6.401 (95.4%)	146.9	2.501 (5.48%)	23.825 (52.17%)	35459
NTRJ	50.089	7.513	7.238 (96.3%)	6.895 (91.8%)	46.530 (92.9%)	6.827 (90.9%)	6.725 (98.5%)	6.520 (95.5%)	146.7	1.714 (3.68%)	33.381 (71.74%)	34195
TTL	47.954	7.193	6.937 (96.4%)	6.608 (91.9%)	44.561 (92.9%)	6.551 (91.1%)	6.455 (98.5%)	6.258 (95.5%)	147	3.903 (8.76%)	31.918 (71.63%)	37004
TTRX	48.641	7.296	7.030 (96.3%)	6.697 (91.8%)	45.106 (92.7%)	6.635 (90.9%)	6.536 (98.5%)	6.339 (95.5%)	147.1	1.345 (2.98%)	35.402 (78.49%)	36903
TTRJ	48.552	7.283	6.990 (96.0%)	6.638 (91.1%)	44.423 (91.5%)	6.522 (89.6%)	6.421 (98.5%)	6.222 (95.4%)	146.8	1.239 (2.79%)	31.596 (71.13%)	36562
TNL	43.538	6.531	6.309 (96.6%)	6.028 (92.3%)	40.595 (93.2%)	5.978 (91.5%)	5.895 (98.6%)	5.726 (95.8%)	147.3	1.149 (2.83%)	34.577 (85.18%)	35576
TNRX	44.942	6.741	6.517 (96.7%)	6.229 (92.4%)	42.073 (93.6%)	6.192 (91.9%)	6.105 (98.6%)	5.929 (95.8%)	147.2	1.075 (2.55%)	34.640 (82.33%)	36633
TNRJ	59.44	8.916	8.547 (95.9%)	8.081 (90.6%)	54.906 (92.4%)	8.128 (91.2%)	7.948 (97.8%)	7.635 (93.9%)	148	1.451 (2.64%)	47.830 (87.11%)	35415
Note: L+Sample: Leaf of treatment, RX+Sample: New roots of treatments, RJ+Sample: Primitive roots of treatments; the same as below
